# Supplementary figures and images for: Novel α-Glucosidase Inhibitory Peptides Identified In Silico from Dry-Cured Pork Loins with Probiotics through Peptidomic and Molecular Docking Analysis
Source: MDPI journal article supplement (doi:10.3390/nu15163539), 2023-08-11

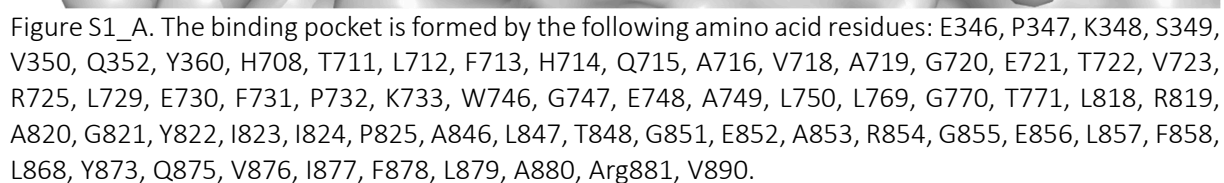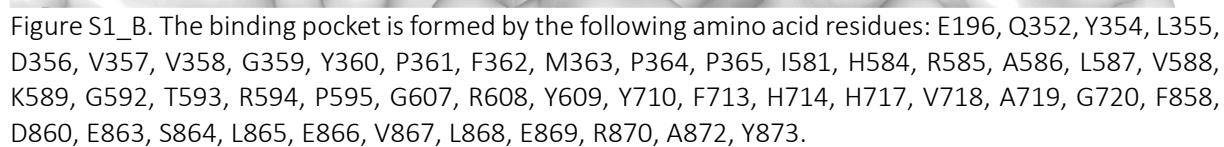

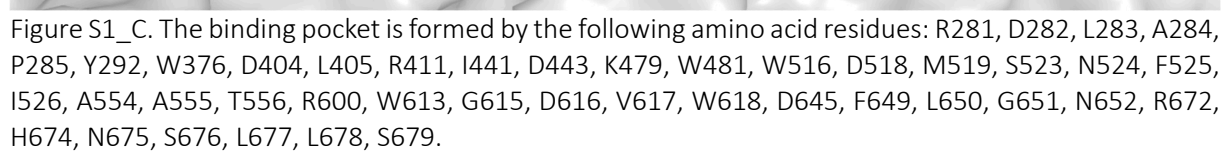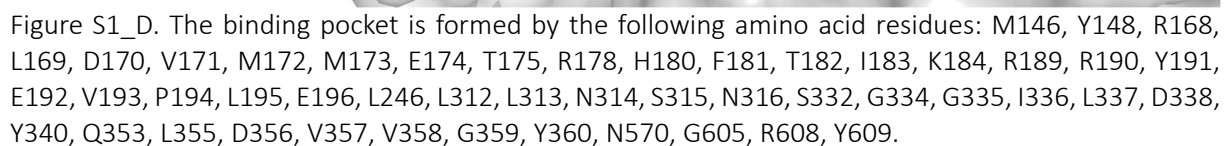



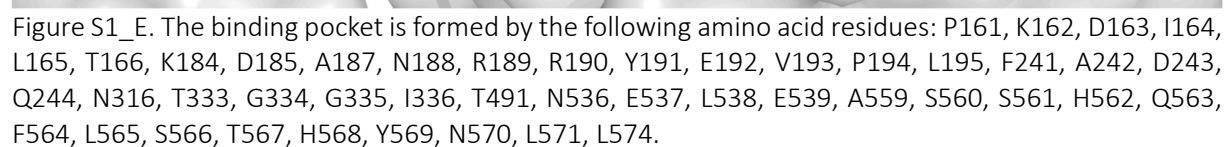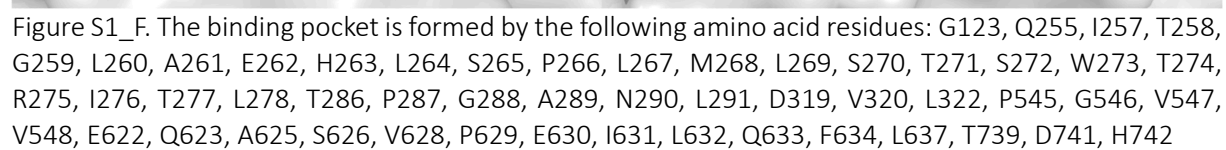

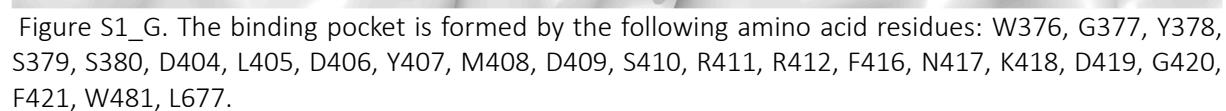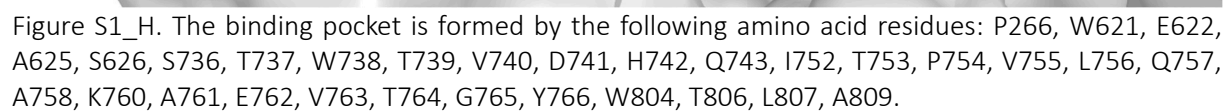



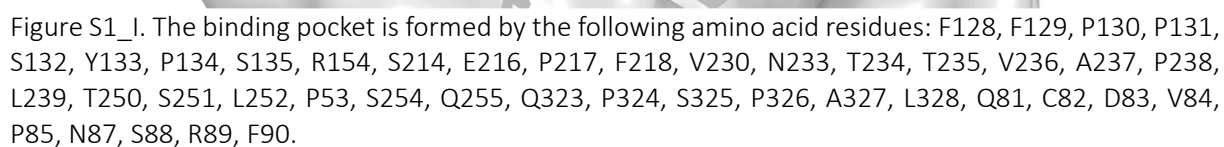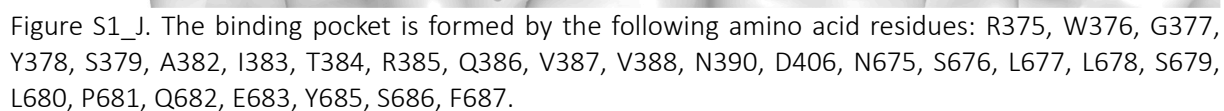

Supplement: s1 [file s1]
